# Supplementary material for: Experiences in Cardiovascular Screening of Professional Athletes Using Echocardiography and Electrocardiography at Jakaya Kikwete Cardiac Institute in Tanzania
Source: Research Square preprint supplement (doi:10.21203/rs.3.rs-8290110/v1), 2026-01-19
Supplement: Supplementary file 1 [file aefa64030e492ed895b8e35d.pdf]

## 14-element AHA Cardiovascular Screening Checklist for Congenital and genetic Disease Questionnaire plus ECG and Echo Data Collection Tool

## The 14-Element AHA Cardiovascular Screening Checklist for Congenital and Genetic Heart Disease

## Personal history

**Yes    No**

- ☐ ☐ 1. Chest pain/discomfort/tightness/pressure related to exertion
- ☐ ☐ 2. Unexplained syncope/near-syncope\*
- ☐ ☐ 3. Excessive exertional and unexplained dyspnea/fatigue or palpitations, associated with exercise
- ☐ ☐ 4. Prior recognition of a heart murmur
- ☐ ☐ 5. Elevated systemic blood pressure
- ☐ ☐ 6. Prior restriction from participation in sports
- ☐ ☐ 7. Prior testing for the heart, ordered by a physician

## Family history

**Yes    No**

- ☐ ☐ 8. Premature death (sudden and unexpected, or otherwise) before age 50 attributable to heart disease in  $\geq 1$  relative
- ☐ ☐ 9. Disability from heart disease in close relative  $< 50$  y of age
- ☐ ☐ 10. Hypertrophic or dilated cardiomyopathy, long-QT syndrome, or other ion channelopathies, Marfan syndrome, or clinically significant arrhythmias; specific knowledge of certain cardiac conditions in family members

## Physical Examination

**Yes    No**

- ☐ ☐ 11. Heart murmur\*\*
- ☐ ☐ 12. Femoral pulses to exclude aortic coarctation
- ☐ ☐ 13. Physical stigmata of Marfan syndrome
- ☐ ☐ 14. Brachial artery blood pressure (sitting position)\*\*\*

*\*Judged not to be of neurocardiogenic (vasovagal) origin; of particular concern when occurring during or after physical exertion.*

*\*\*Refers to heart murmurs judged likely to be organic and unlikely to be innocent; auscultation should be performed with the patient in both the supine and standing positions (or with Valsalva maneuver), specifically to identify murmurs of dynamic left ventricular outflow tract obstruction.*

\*\*\**Preferably taken in both arms.*

### Data collection tool

### Data collection tool

[illegible]
